# Supplementary material
Source: ML conference proceedings conference paper supplement (https://openreview.net/forum?id=FwpyP1gpNj)
Supplement: supplementary_material [file attachment]

## A Formal domain description

Jax functions automatically compile to a fixed behavior when they receive their first input data. As such, if one wants different domain functionality across different *contexts* (e.g. training vs. testing), the domain’s functions typically need a “`env_parameter`” argument. Thus, Jax-based domains are naturally formulated as Partially Observable Contextual Markov Decision Processes (POCMDPs)  $\mathcal{M}_c = \langle S, \mathcal{A}, \mathcal{X}, \mathcal{C}, \rho, P, R, O \rangle$  [28, 34]. Here,  $S$  denotes the environment state space,  $\mathcal{A}$  denotes its action space,  $\mathcal{X}$  denotes (potentially partial) observations of the environment, and  $\mathcal{C}$  denotes a space of contexts that an MDP can be in. `env_parameter` then corresponds to an MDP’s context  $c \in \mathcal{C}$ . It can be used to augment the initial state distribution  $\rho_c(s_0)$  (e.g. having an agent start in different states in different contexts), the transition probabilities,  $P_c(s'|s, a)$  (e.g. an agent’s speed or strength can be changed in different contexts), the reward function  $R_c(s)$  (e.g. different objects can be rewarded in different contexts), or the observation function  $O_c(s)$  (e.g. objects can take on different colors in different contexts).

An episode proceeds as follows. An initial state  $s_0 \in S$  is sampled from the initial state distribution  $\rho_c(s_0)$ . When an agent takes an action  $a \in \mathcal{A}$  in state  $s \in S$ , the next state  $s'$  is sampled according to a next state distribution  $s' \sim P_c(\cdot|s, a)$ . The agent then receives an observation  $x' = O_c(s')$  and reward  $r' = R_c(o)$ . Note that  $c$  is typically fixed within an episode.

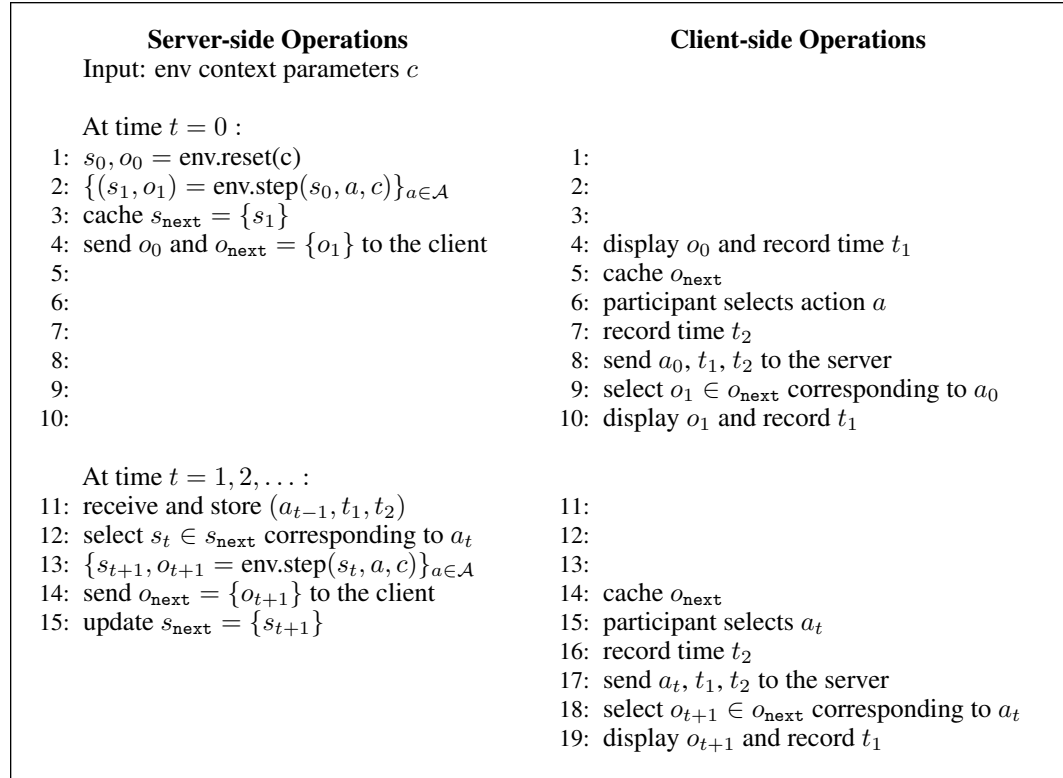

Figure 8: **Server-client Human-Environment Interaction Protocol**. Note that we omit displaying reward  $r$  due to space constraints.

Let `env` be the programmatic object representing a domain. In our library (and many RL libraries),  $s_0, o_0 = \text{env.step}(c)$  essentially plays the role of sampling from the initial state distribution and computing the corresponding observation for the agent. The standard practice is to have  $s_{t+1}, o_{t+1}, r_{t+1} = \text{env.step}(s_t, a_t, c)$  implement (a) sampling a new state (b) computing the corresponding reward, (c) computing the observation that an agent will get.

## B Descriptions of stage types

Currently, there are three basic stage classes, though more can easily be added.

- 535 1. **Stage**: used to display instructions or information to a participant.
- 536 2. **FeedbackStage**: used to collect information from participants. Typically involves an
- 537 interactive screen that does *not* interact with the environment.
- 538 3. **EnvStage**: used to interact with an environment. It takes as input an environment and
- 539 environment parameters. We describe how NiceWebRL uses this abstraction to have a
- 540 remote server-side program display images to one’s local web-browser client in Figure 8.
- 541 We present examples of each in Figure 9.

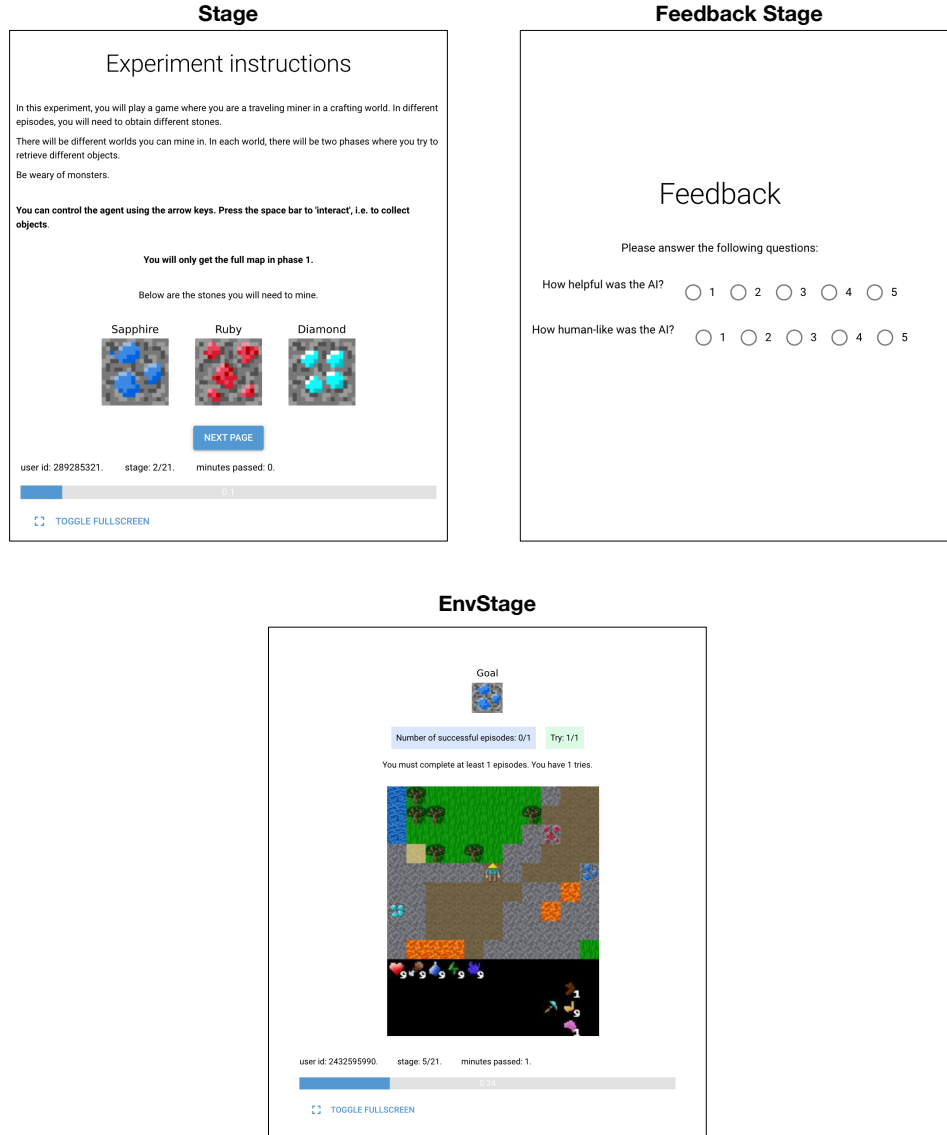

Figure 9: Examples of different kinds of stages.

## 542 C Computing resources

543 For details on case study 1 or 2, please see [14] or [33], respectively. For case study 3, experiments

544 were conducted using computing infrastructure from the [fly.io](https://fly.io) platform with the “performance-2x”

545 configuration. This is a machine with 4GB of RAM. The machine had no GPU. Even in this setting,

546 Jax’s compilation features provide a significant speed up to environment computation.

## 547 **D Human subject experiment details**

548 Our study is approved by the University IRB. All subjects were recruited with [https://www.](https://www.cloudresearch.com/)  
549 [cloudresearch.com/](https://www.cloudresearch.com/) and provided informed consent. We provide the consent form in the GitHub  
550 example. Participants were compensated \$4 for completing the task. The average task completion  
551 time was 23.33 minutes. At the beginning of each experiment, the participants provided demographic  
552 information (age and gender, coded as male or female).
